# Supplementary material
Source: PubMed Central journal article supplement (PMC3868834)
Supplement: supp_fj.13-235382_13-235382SuppData.pdf [file supp_fj.13-235382_13-235382SuppData.pdf]

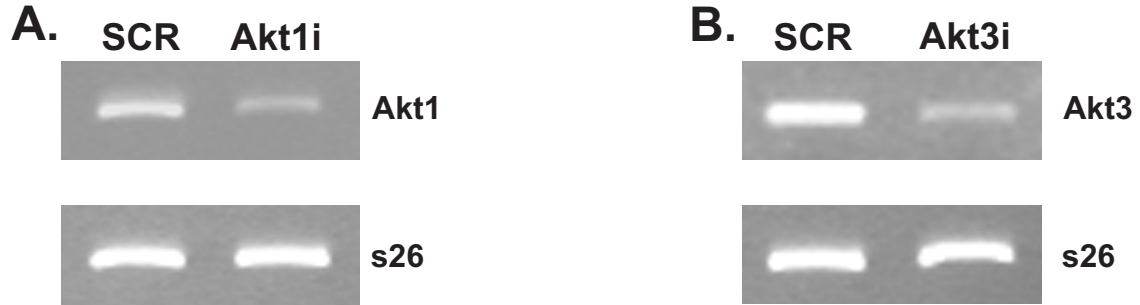

**Supplemental Figure 1.** (A) Semiquantitative PCR from cDNA made from HUVECs transfected with scramble (SCR) or Akt1 RNAi for 48 hours. s26 was used as an internal control. (B) Semiquantitative PCR from cDNA made from HUVECs transfected with SCR or Akt3 RNAi for 48 hours, with s26 used as an internal control.
